# Supplementary material for: Tagging enhances histochemical and biochemical detection of Ran Binding Protein 9 in vivo and reveals its interaction with Nucleolin
Source: PubMed Central journal article supplement (PMC7188826; doi:10.1038/s41598-020-64047-8), 2020-04-28
Supplement: 41598_2020_64047_MOESM1_ESM.pdf [file 41598_2020_64047_MOESM1_ESM.pdf]

782 **Supplementary Material**

783

784 **Tagging enhances histochemical and biochemical detection of Ran Binding Protein**

785 **9 *in vivo* and reveals its interaction with Nucleolin**

786

787 Shimaa Soliman<sup>1, 2#</sup>, Aaron E. Stark<sup>3, #</sup>, Miranda L. Gardner<sup>1</sup>, Sean W. Harshman<sup>4</sup>,

788 Chelssie C. Breece<sup>5</sup>, Foued Amari<sup>3</sup>, Arturo Orlacchio<sup>1</sup>, Min Chen<sup>3</sup>, Anna Tessari<sup>1</sup>,

789 Jennifer A. Martin<sup>4</sup>, Rosa Visone<sup>2</sup>, Michael A. Freitas<sup>1</sup>, Krista M.D. La Perle<sup>5</sup>, Dario

790 Palmieri<sup>1</sup>, and Vincenzo Coppola<sup>1,3,\*</sup>.

791

792

793

794 <sup>1</sup>Department of Cancer Biology and Genetics, College of Medicine, The Ohio State

795 University and Arthur G. James Comprehensive Cancer Center; <sup>2</sup>Department of

796 Medicine, Dentistry and Biotechnology, G. d'Annunzio University of Chieti, Italy;

797 <sup>3</sup>Genetically Engineered Mouse Modeling Core, The Ohio State University and Arthur G.

798 James Comprehensive Cancer Center; <sup>4</sup>Air Force Research Laboratory, Wright-Patterson

799 AFB, 45433, Ohio, USA; <sup>5</sup>Department of Veterinary Biosciences and Comparative

800 Pathology & Mouse Phenotyping Shared Resource, College of Veterinary Medicine, The

801 Ohio State University and Arthur G. James Comprehensive Cancer Center, Columbus,

802 43210, Ohio, USA.

803

804

805

806

807 **Supplementary Figures**

808

809 **Figure S1.** Generation of the *RanBP9-TT* mouse model by CRISPR/Cas9. **A)** Depiction  
810 of guide RNA (sgRNA; light GREEN) selected to target the last codon of *RanBP9* and  
811 relative on-target (MAROON) and off-target (LIGHT BROWN) scores (Benchling). **B)**  
812 sgRNA sequence and scores (Benchling). **C)** Predicted off-target sites and scores using  
813 the selected sgRNA (Benchling). **D)** Virtual PCR prediction for screening of positively  
814 recombined *RanBP9-TT* KI animals. **E)** Sequence of primers used for mutant KI  
815 screening and expected size (base pair) of amplicons for *WT* and *RanBP9-TT* animals.

816

817 **Figure S2.** IHC detection of *RanBP9* by  $\alpha$ V5 or  $\alpha$ HA in homozygous *RanBP9-TT* mice  
818 compared with detection by  $\alpha$ *RanBP9* specific antibody. Sections from same organs  
819 shown in Figure 2. **A-D)** Cerebellum; **E-H)** Testis; **I-L)** Lung. Sections from indicated  
820 organs from *RanBP9 WT* (**A, B, D, E, F, H, I, J, L**) and *RanBP9-TT* mice (**C, G, K**)  
821 were stained with  $\alpha$ V5 (**A, E, I**),  $\alpha$ HA (**B, F, J**) or with Hematoxylin and Eosin (H&E)  
822 (**C, D, G, H, K, L**). All pictures were taken with 40x objective and 10x eyepiece (400x).  
823 Scale bar = 50um.

824

825 **Figure S3.** IHC detection of V5 in *RanBP9-TT* mice. **A-O)** Selection of indicated  
826 organs/tissues from *RanBP9-TT* homozygous mice stained with  $\alpha$ V5 specific antibody.  
827 All pictures were taken with 40x objective and 10x eyepiece (400x). Scale bar = 50um.  
828 EXCEPT: stomach (10x = 100x, scale bar = 200um); large intestine (10x = 100x, scale  
829 bar = 200um); mammary gland (60x = 600x, scale bar = 20um).

830

831 **Figure S4.** IHC detection of HA in *RanBP9-TT* mice. **A-O)** Selection of indicated organs

832 and tissues from homozygous *RanBP9-TT* mice stained with  $\alpha$ HA specific antibody.

833 All pictures were taken with 40x objective and 10x eyepiece (400x). Scale bar = 50um

834 EXCEPT: stomach (10x = 100x, scale bar = 200um); large intestine (10x = 100x, scale

835 bar = 200um); mammary gland (60x = 600x, scale bar = 20um).

836

837

838 **Proteomic data.** The datasets generated and analyzed for this study are available in the

839 MassIVE repository [MSV000084462] at: (<ftp://massive.ucsd.edu/MSV000084462/>).

840 Alternatively, they are available from corresponding author on request.

# Figure S1. Generation of the RanBP9-TT Mouse by CRISPR/Cas9

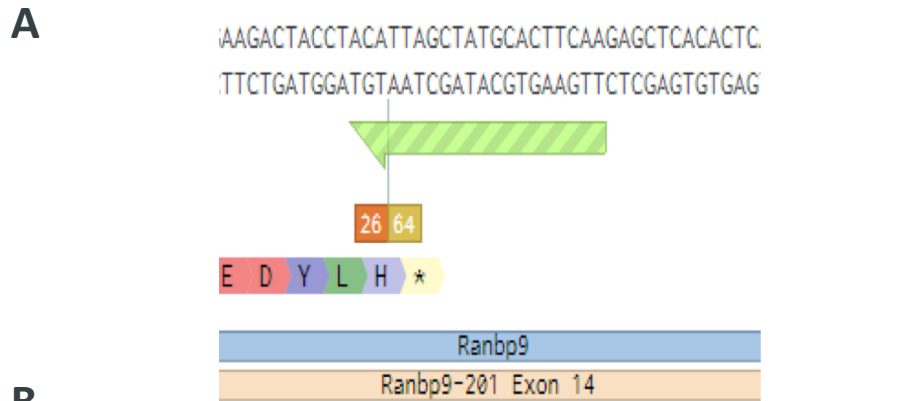

**C**

| Sequence             | PAM | Score | Gene                                 | Locus           |
|----------------------|-----|-------|--------------------------------------|-----------------|
| TTGAAGTGCATAGCTAATGT | AGG | 100.0 | Ranbp9<br>(ENSMUSG00000038546)       | chr13:+43403563 |
| AATAAGTGCATAGCTAATGT | TAG | 2.3   |                                      | chr13:-29291755 |
| TTGATGTACACAGCTAATGT | GGG | 1.5   |                                      | chr11:+11476826 |
| AAAAGTACATAGCTAATGT  | TAG | 1.5   |                                      | chr18:+15335082 |
| TTGATGTGCATGGCTAATGT | CAG | 1.4   |                                      | chr3:-63084635  |
| TGGAAGAGCATAGCTAATGA | AGG | 1.3   | RP23-145F9.4<br>(ENSMUSG00000103083) | chr1:-171680603 |

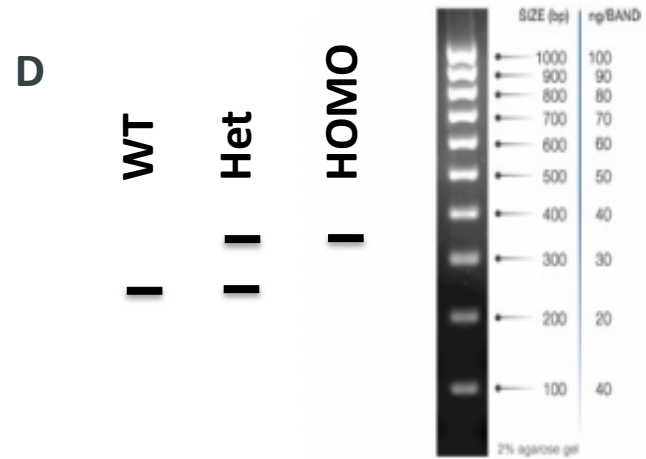

**E**

Forward Primer: **AAACCCACAATCTGCCAAAG**  
 Reverse Primer: **AAAGCGACAAAACCTGTCC**

**WT:            256 bp**  
**BP9-TT:       343 bp**

**Figure S2.** IHC detection of RanBP9 by V5 in RanBP9-TT mice.

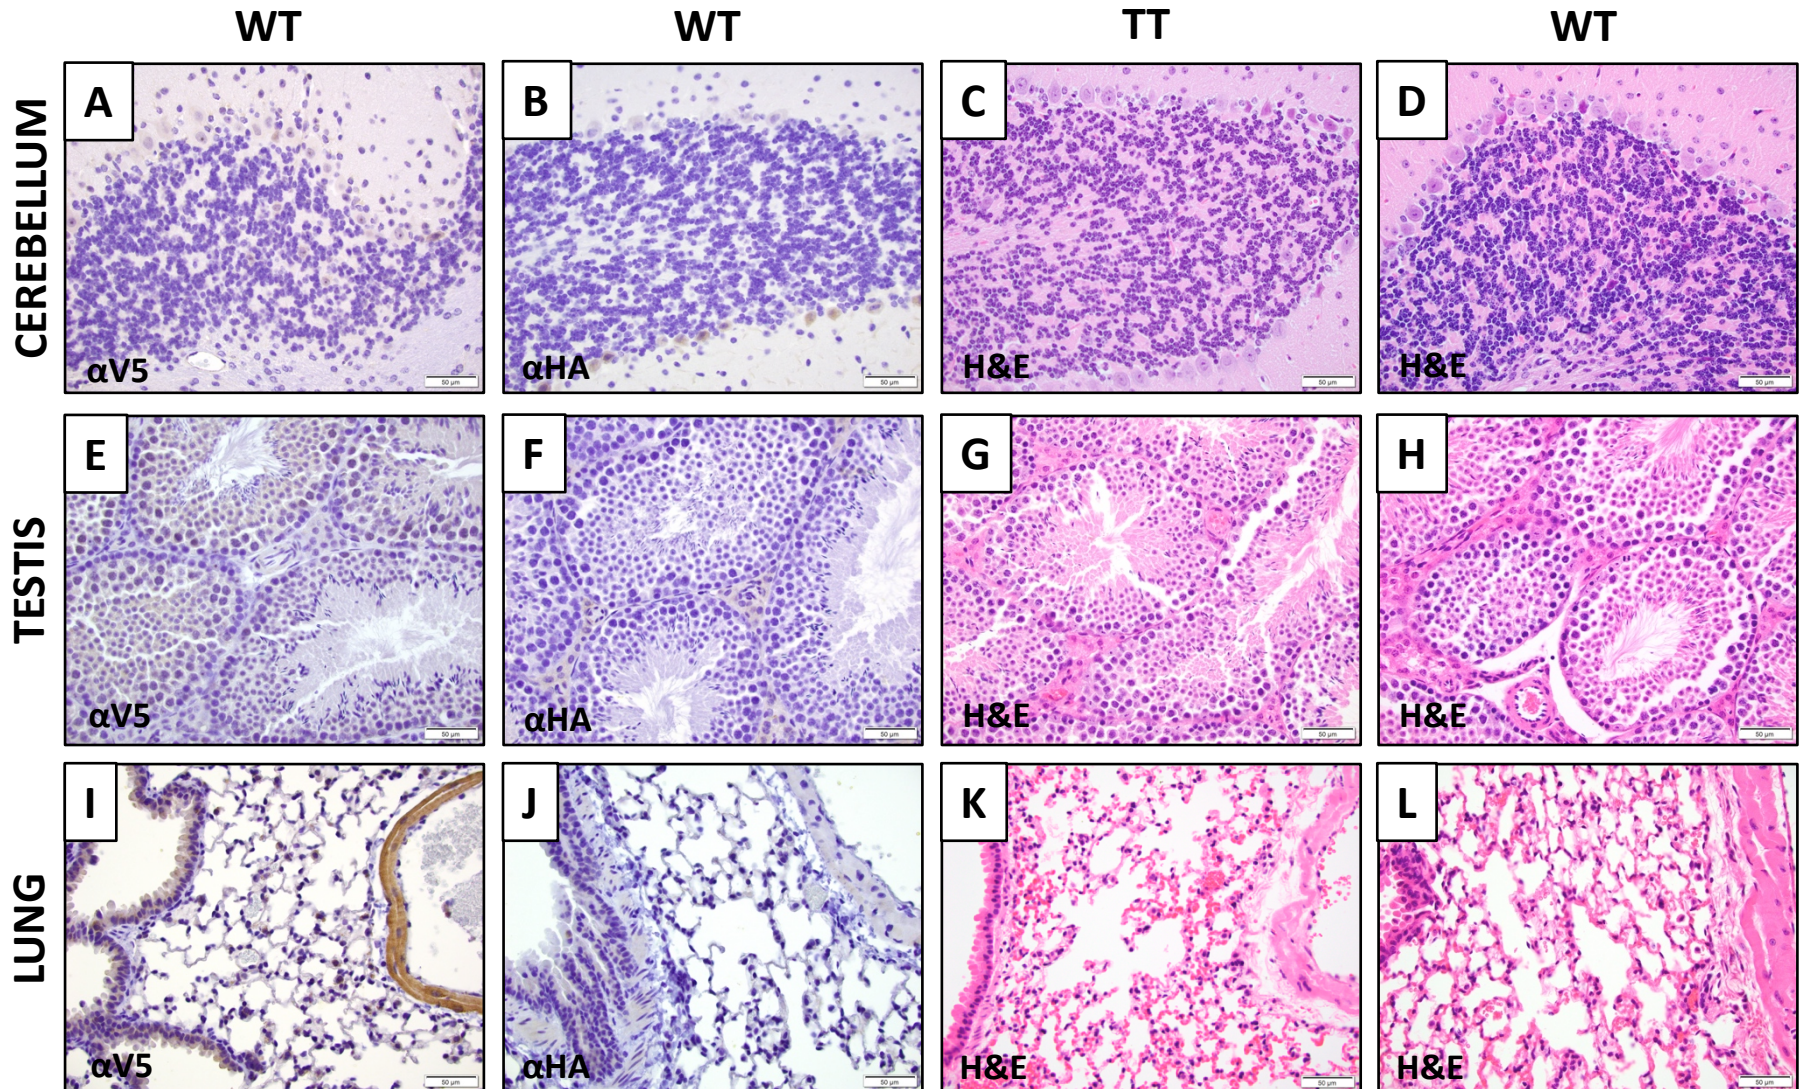

**Figure S3.** IHC detection of RanBP9 by V5 in RanBP9-TT mice.

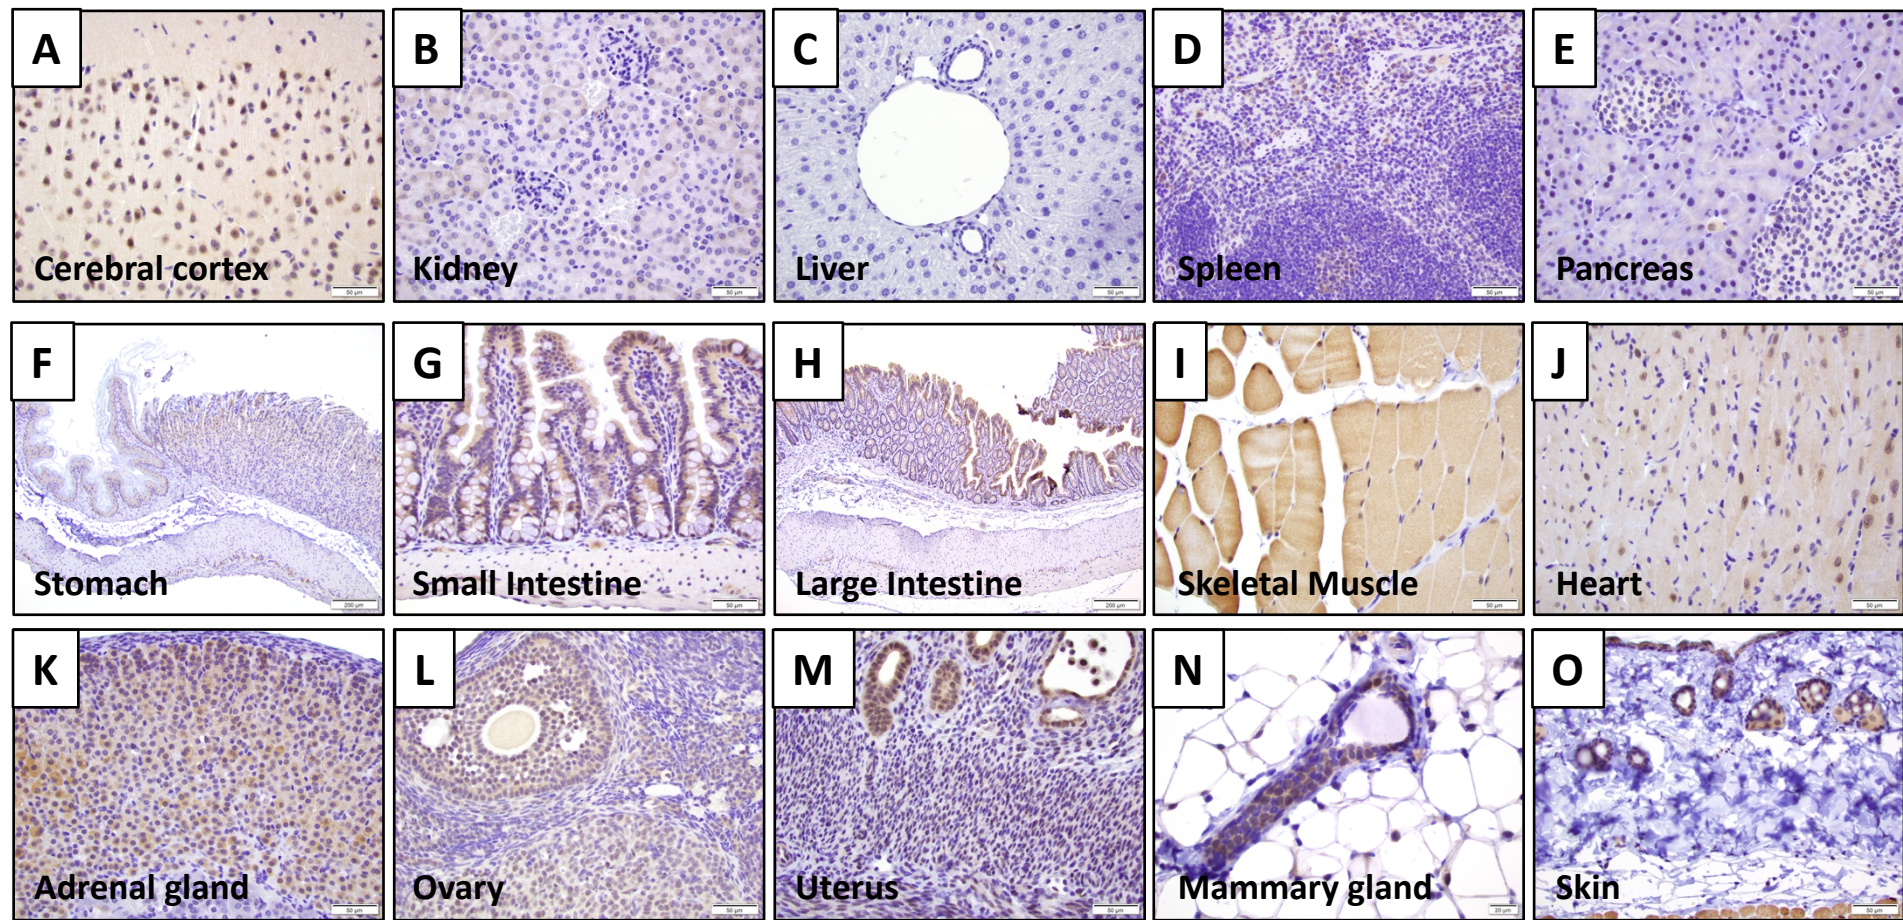

**Figure S4.** IHC detection of RanBP9 by HA in RanBP9-TT mice.

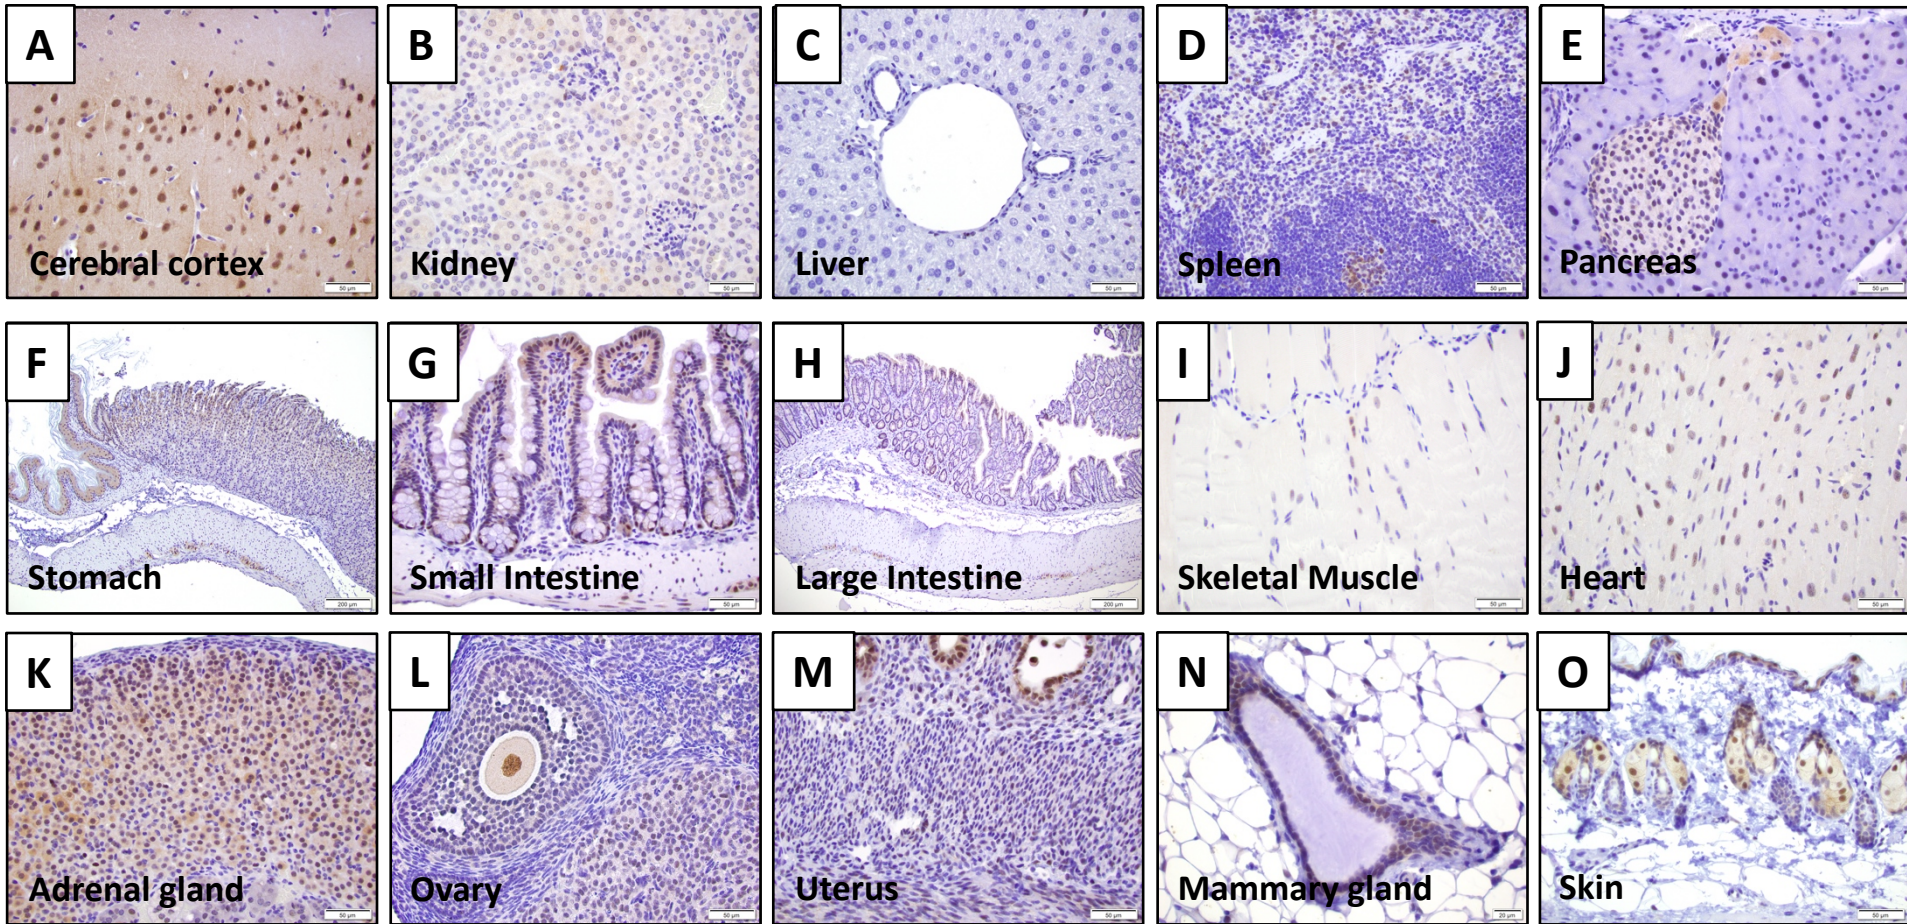

Supplementary Table 1. Primary antibodies used for this investigation

| Name of the antibody                                           | Company website/Validation data                                                                                                                                                                                                                                                            | Dilution |         | Amount |
|----------------------------------------------------------------|--------------------------------------------------------------------------------------------------------------------------------------------------------------------------------------------------------------------------------------------------------------------------------------------|----------|---------|--------|
|                                                                |                                                                                                                                                                                                                                                                                            | WB       | IHC     | IP     |
| 1 rabbit aRanBP9 antibody, cat. nr. HPA050007                  | <a href="https://www.proteinatlas.org/ENSG00000010017-RANBP9/antibody#western_blot">https://www.proteinatlas.org/ENSG00000010017-RANBP9/antibody#western_blot</a><br>We have previously used and validate this antibody with RANBP9 KO cells (Palmieri et al., 2016; Tessari et al., 2018) | -----    | -----   | 1:50   |
| 2 goat V5 antibody, Abcam cat. nr. ab95038                     | <a href="https://www.abcam.com/v5-tag-antibody-ab95038.html">https://www.abcam.com/v5-tag-antibody-ab95038.html</a>                                                                                                                                                                        | -----    | -----   | 1:350  |
| 3 rabbit HA, Cell Signaling cat. nr. C29F4                     | <a href="https://www.cellsignal.com/products/primary-antibodies/ha-tag-c29f4-rabbit-mab/3724">https://www.cellsignal.com/products/primary-antibodies/ha-tag-c29f4-rabbit-mab/3724</a>                                                                                                      | -----    | -----   | 1:800  |
| 4 RANBP9, Abcam cat. nr. ab140627                              | <a href="https://www.abcam.com/ranbp9-antibody-epr9920b-ab140627.html">https://www.abcam.com/ranbp9-antibody-epr9920b-ab140627.html</a>                                                                                                                                                    | 1:2,000  | 5% milk | -----  |
| 5 GAPDH, Cell Signaling cat. nr. 3683S                         | <a href="https://www.cellsignal.com/products/antibody-conjugates/gapdh-14c10-rabbit-mab-hrp-conjugate/3683">https://www.cellsignal.com/products/antibody-conjugates/gapdh-14c10-rabbit-mab-hrp-conjugate/3683</a>                                                                          | 1:3,000  | 5% milk | -----  |
| 6 monoclonal HA-Agarose antibody, Sigma cat. nr. A2095-1ML     | <a href="https://www.sigmaaldrich.com/catalog/product/sigma/a2095?lang=en&amp;region=US">https://www.sigmaaldrich.com/catalog/product/sigma/a2095?lang=en&amp;region=US</a>                                                                                                                | -----    | -----   | 5ug    |
| 7 RMND5A, Novus Biologicals cat. nr. NBP1-92337                | <a href="https://www.novusbio.com/products/rmnd5a-antibody_nbp1-92337">https://www.novusbio.com/products/rmnd5a-antibody_nbp1-92337</a>                                                                                                                                                    | 1:1,000  | 5% milk | -----  |
| 8 WDR26, Abcam cat. nr. ab85962                                | <a href="https://www.abcam.com/wdr26-antibody-ab85962.html">https://www.abcam.com/wdr26-antibody-ab85962.html</a>                                                                                                                                                                          | 1:1,000  | 5% milk | -----  |
| 9 ARMC8, Proteintech cat. nr. 12653-1-AP                       | <a href="https://www.ptglab.com/products/ARMC8-Antibody-12653-1-AP.htm">https://www.ptglab.com/products/ARMC8-Antibody-12653-1-AP.htm</a>                                                                                                                                                  | 1:1,000  | 5% milk | -----  |
| 10 Muskelin, Proteintech cat. nr. 14735-1-AP                   | <a href="https://www.ptglab.com/products/MKLN1-Antibody-14735-1-AP.htm">https://www.ptglab.com/products/MKLN1-Antibody-14735-1-AP.htm</a>                                                                                                                                                  | 1:1,000  | 5% milk | -----  |
| 11 C20orf11 (a.k.a. GID8), Proteintech cat. nr. 24479-1-AP     | <a href="https://www.ptglab.com/products/C20orf11-Antibody-24479-1-AP.htm">https://www.ptglab.com/products/C20orf11-Antibody-24479-1-AP.htm</a>                                                                                                                                            | 1:1,000  | 5% milk | -----  |
| 12 MAEA, R&D Systems cat. nr. AF7288                           | <a href="https://www.rndsystems.com/products/human-mouse-rat-emp-maea-antibody_af7288">https://www.rndsystems.com/products/human-mouse-rat-emp-maea-antibody_af7288</a>                                                                                                                    | 1:2,000  | 5% milk | -----  |
| 13 RanBP10, Millipore SIGMA; cat. nr. SAB3500163               | <a href="https://www.sigmaaldrich.com/catalog/product/sigma/sab3500163?lang=en&amp;region=US">https://www.sigmaaldrich.com/catalog/product/sigma/sab3500163?lang=en&amp;region=US</a>                                                                                                      | 1:1,000  | 5% milk | -----  |
| 14 Nucleolin, D4C7O; Cell Signaling; rabbit mAB cat. nr. 14574 | <a href="https://www.cellsignal.com/products/primary-antibodies/nucleolin-d4c7o-rabbit-mab/14574">https://www.cellsignal.com/products/primary-antibodies/nucleolin-d4c7o-rabbit-mab/14574</a>                                                                                              | 1:2,000  | 5% milk | -----  |
| 15 V5 antibody, Invitrogen cat. nr. R96025                     | <a href="https://www.thermofisher.com/antibody/primary/target/v5%20tag">https://www.thermofisher.com/antibody/primary/target/v5%20tag</a>                                                                                                                                                  | 1:1,000  | 5% milk | -----  |
| 15 mouse Vinculin antibody, Abcam cat. nr. Ab130007            | <a href="https://www.abcam.com/vinculin-antibody-vin-54-ab130007.html">https://www.abcam.com/vinculin-antibody-vin-54-ab130007.html</a>                                                                                                                                                    | 1:2,000  | 5% milk | -----  |



FIG 3 B  
VS

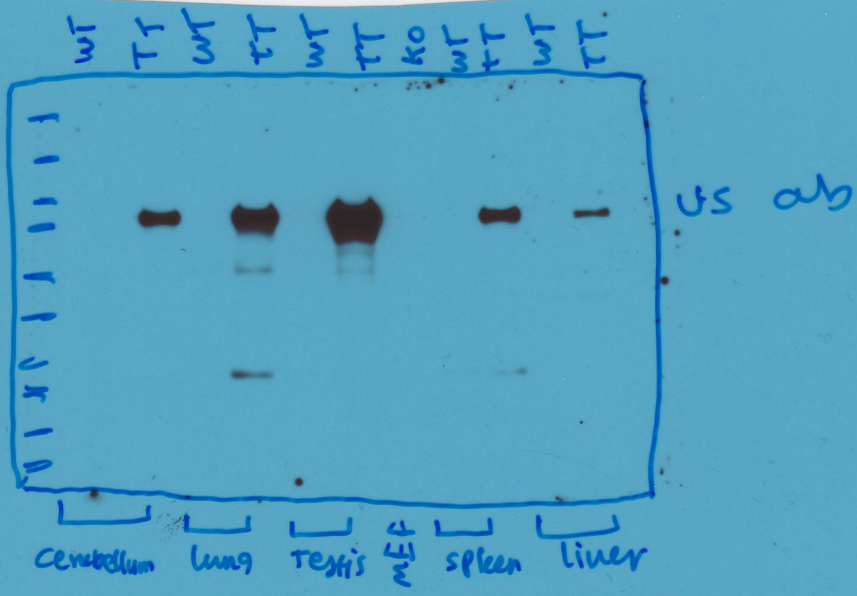

HA ab

HA  
FIG 3 C

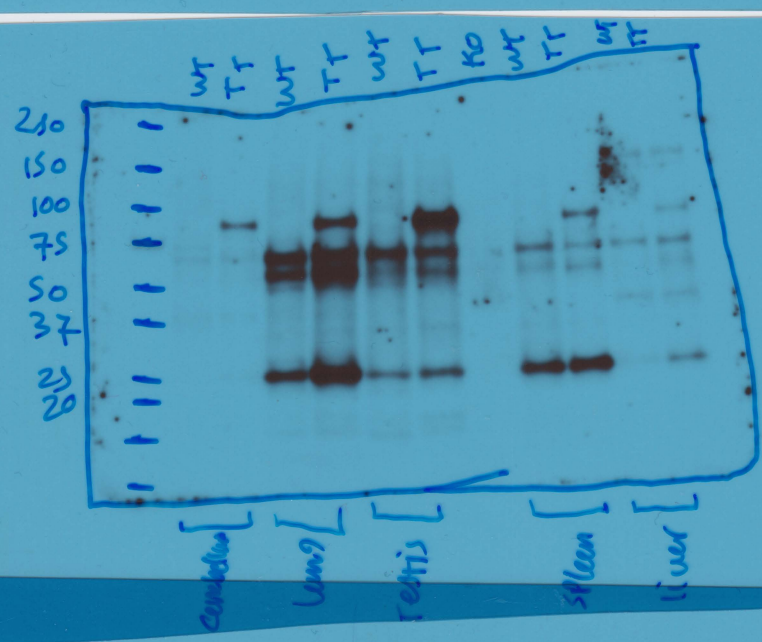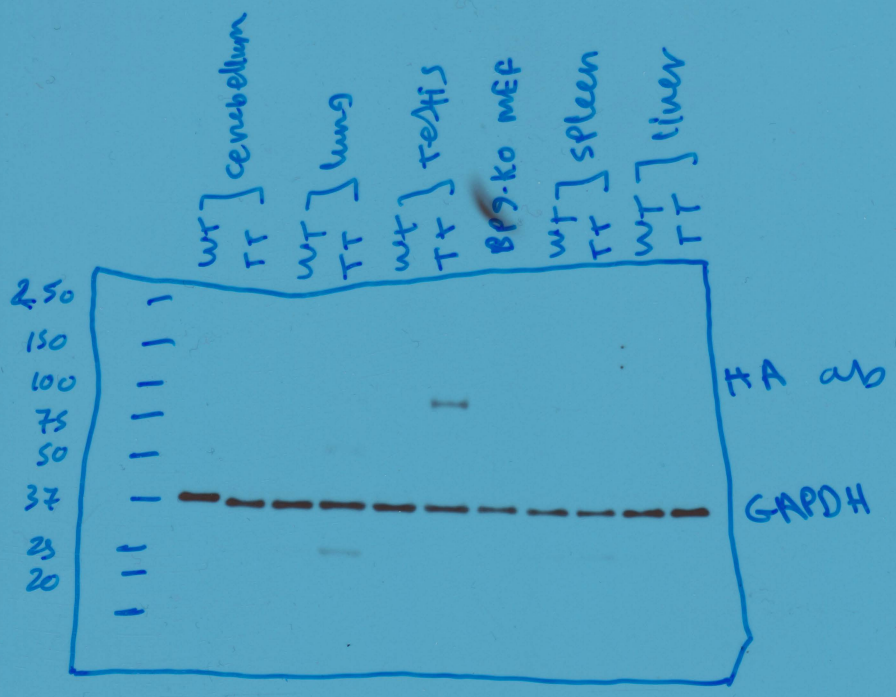

FIG 3 C  
GAPDH

FIG 3 A  
GAPDH

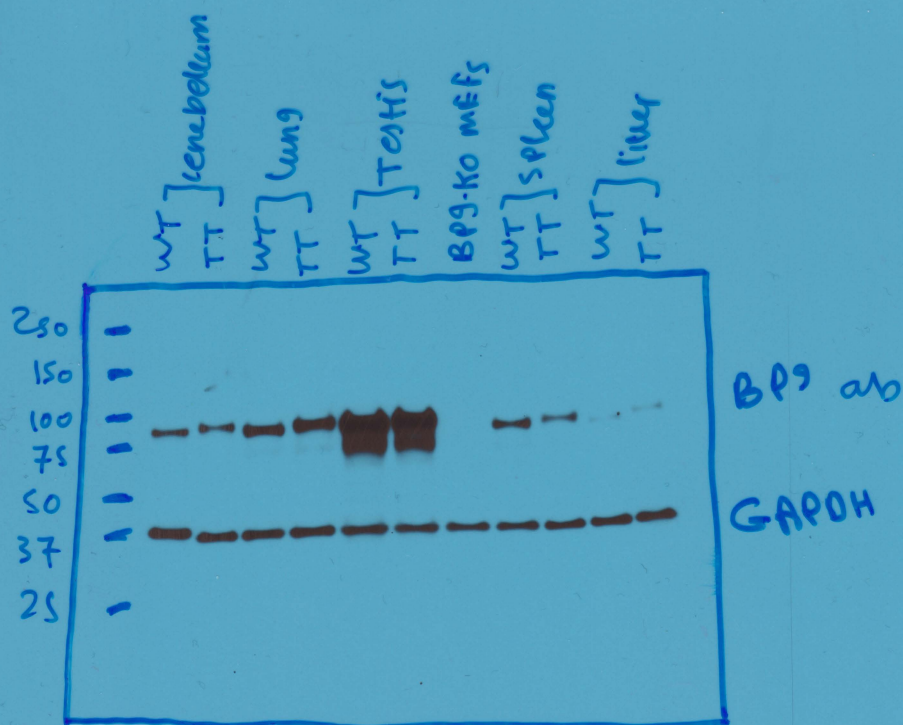

FIG 3 B  
GAPDH

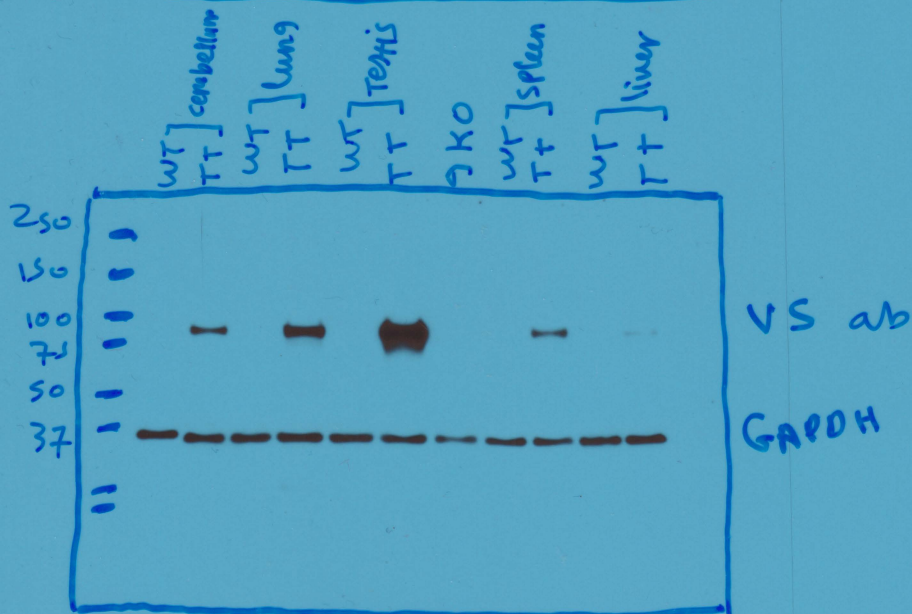

FIG 4A

ENB 1.16.20

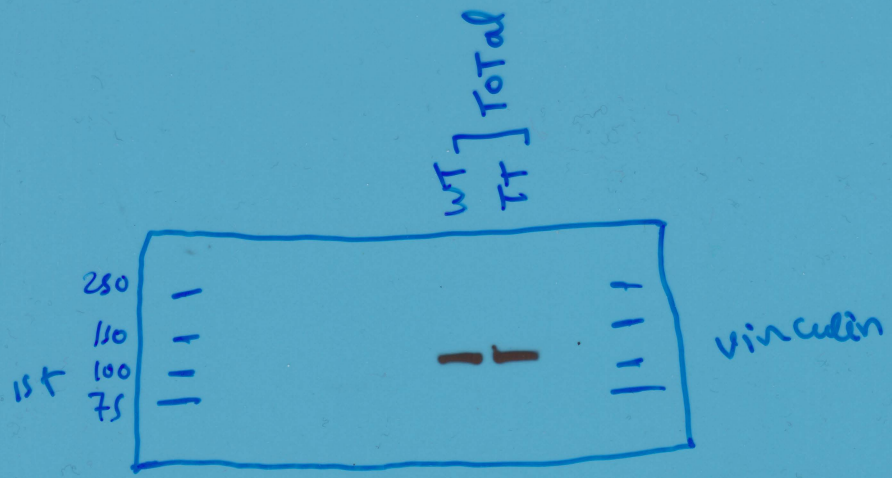

FIG 4A

ENB 1-16-20

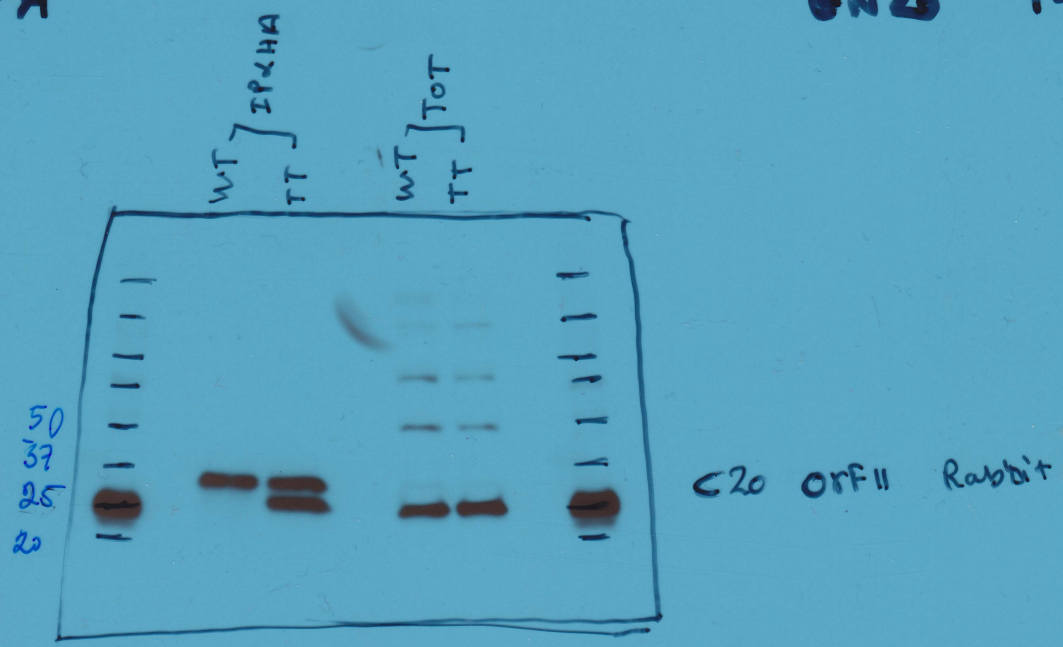

FIG 4A

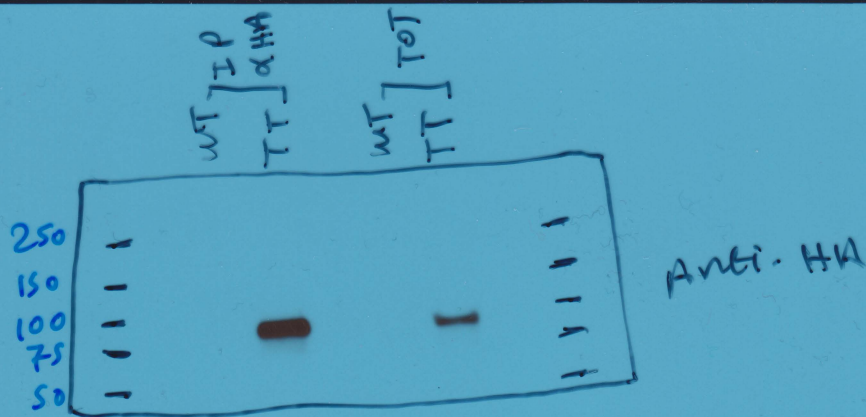

ENZO 1-16-20

FIG 4A

ENZO 1-16-20

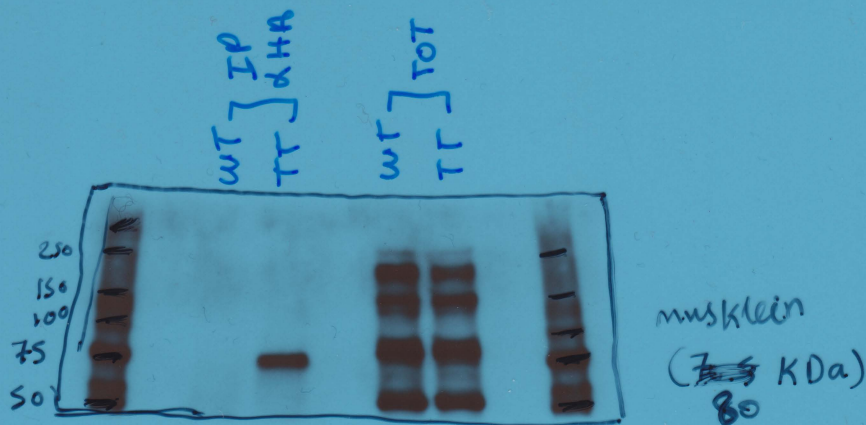

ENB 1-16-20

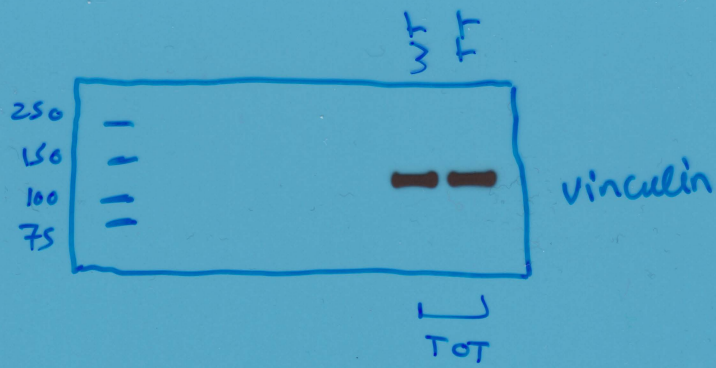

FIG 4B

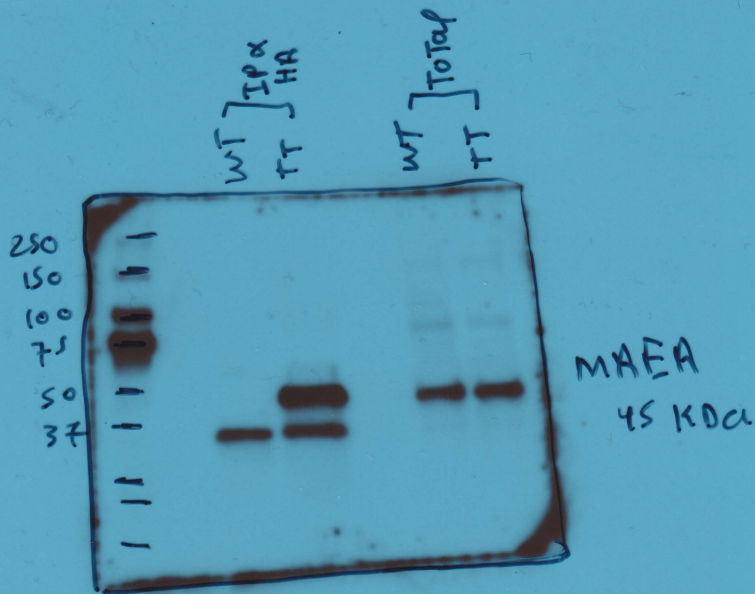

ENB 1-16-20

FIG 4B

END 1-16-20

FIG 4B

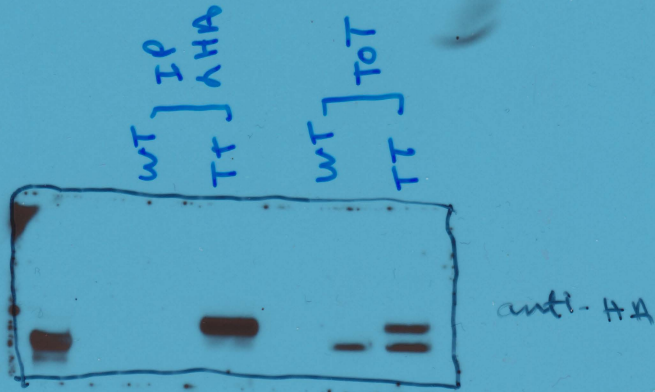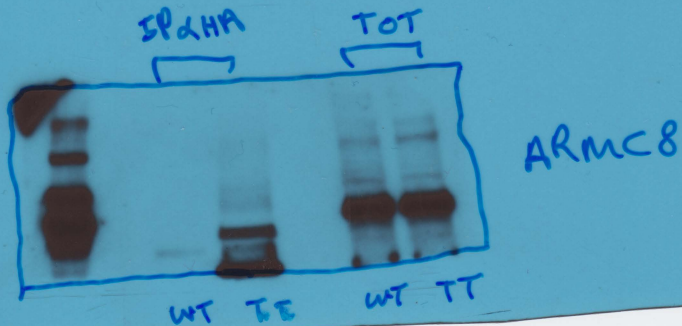

END  
1-16-20

FIG 4B

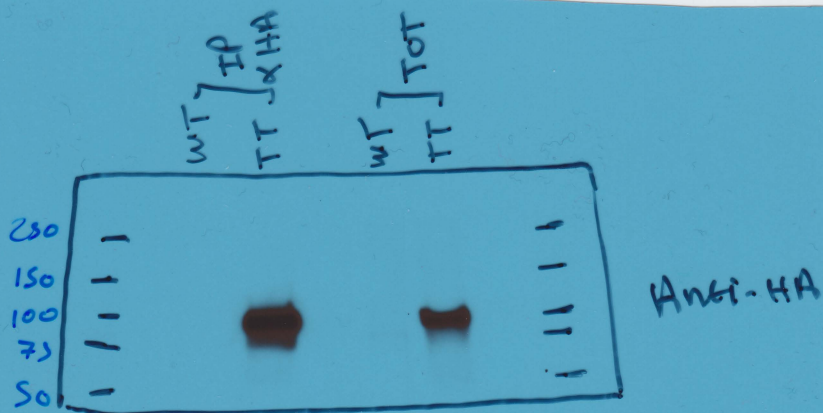

EMO 1-16-2

FIG 4C

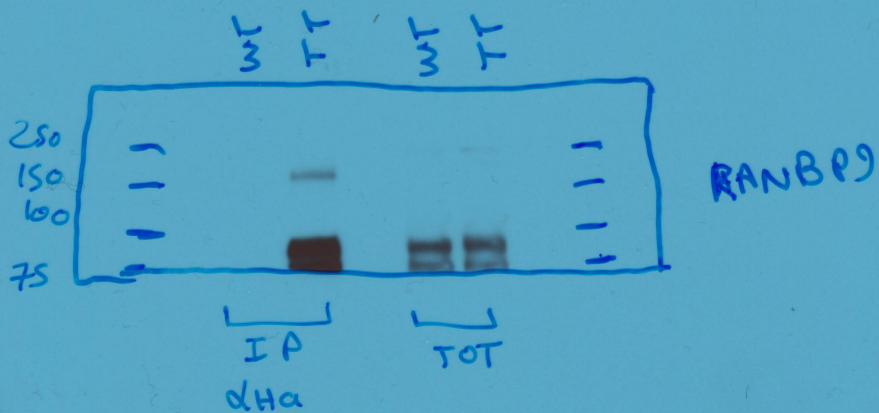

FIG 4c

EMO  
1-16-2

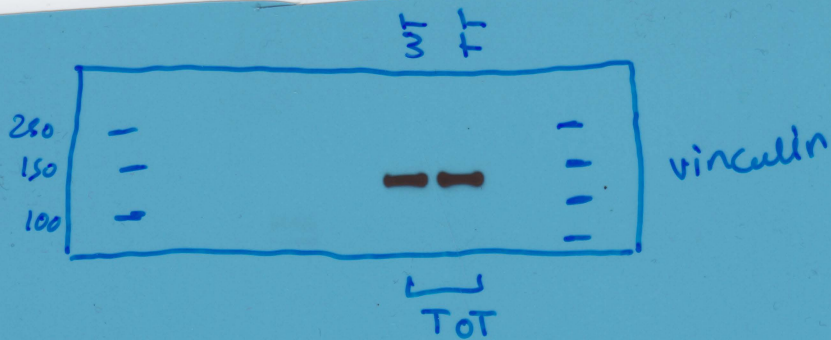

END 1-16-20

FIG 4C

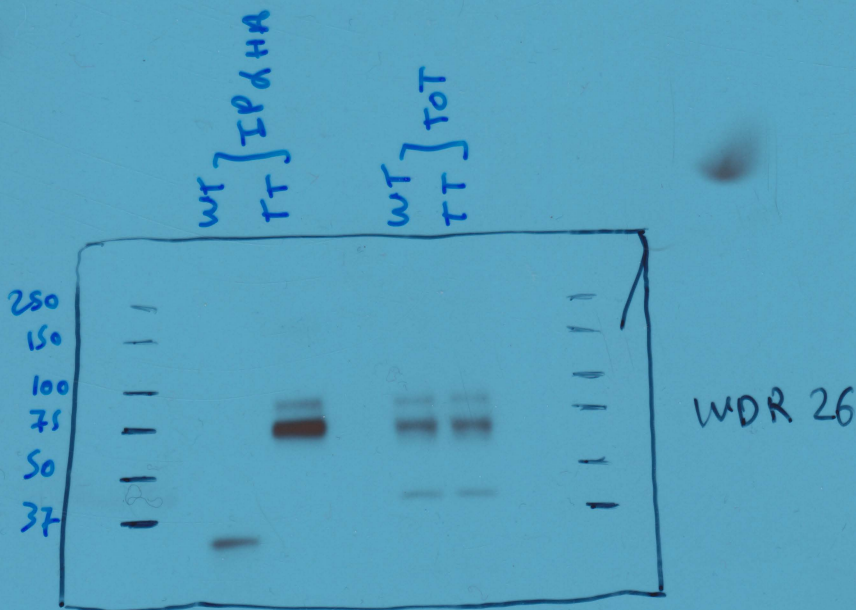

FIG 4C

END 1-16-20



FIG 4D

RMNDSA

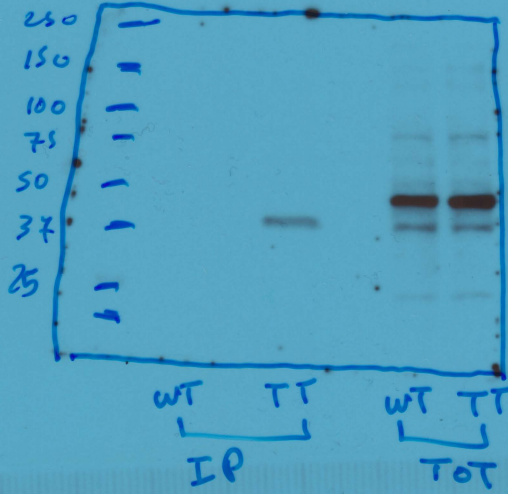

ENR 1-16-20

ENR 1-16-20

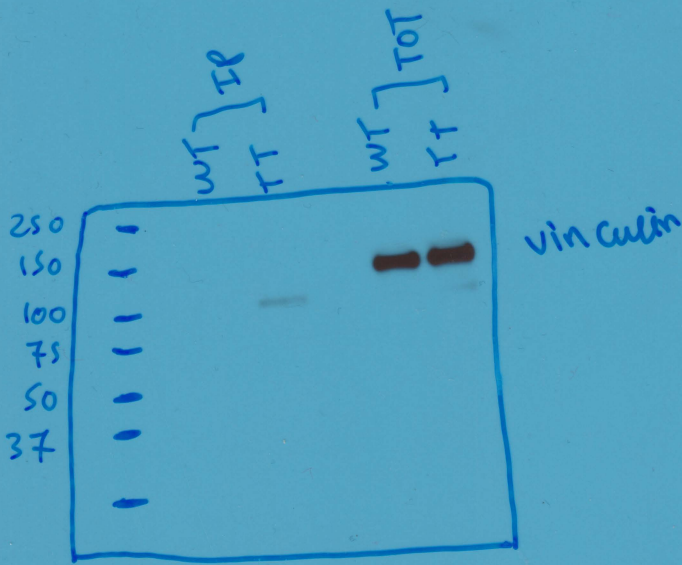

FIG 4D

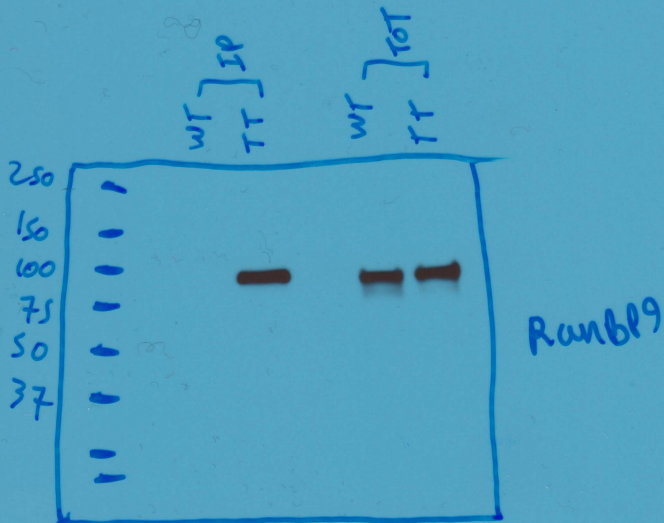

ENR 1-16-20

FIG 4D

Enzo 1-16-20

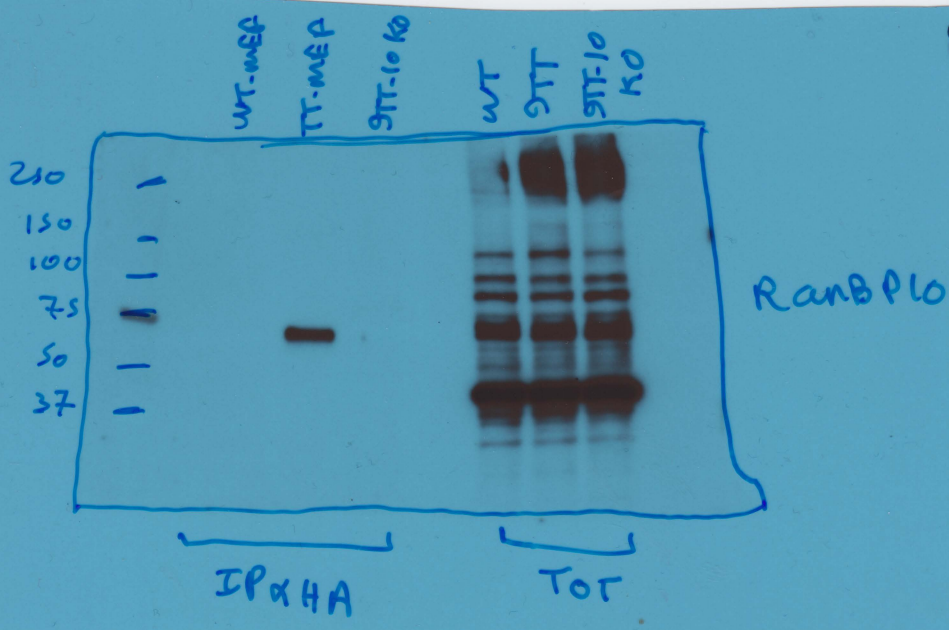

FIG 4E

Enzo 1-16-20

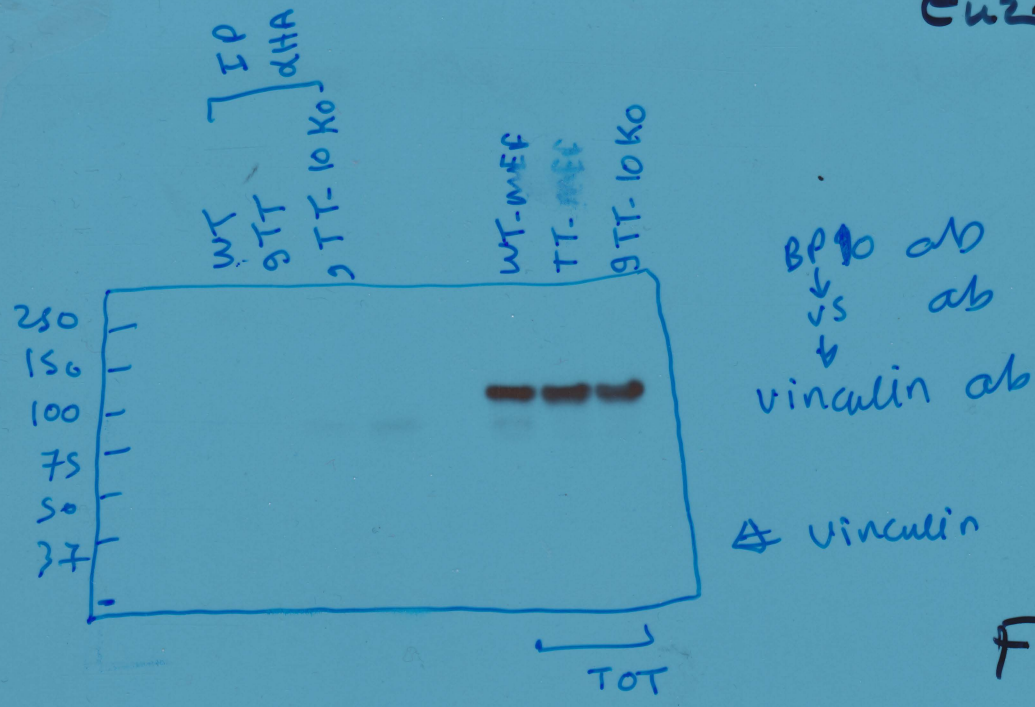

FIG 4E

Enzo 1-16-20

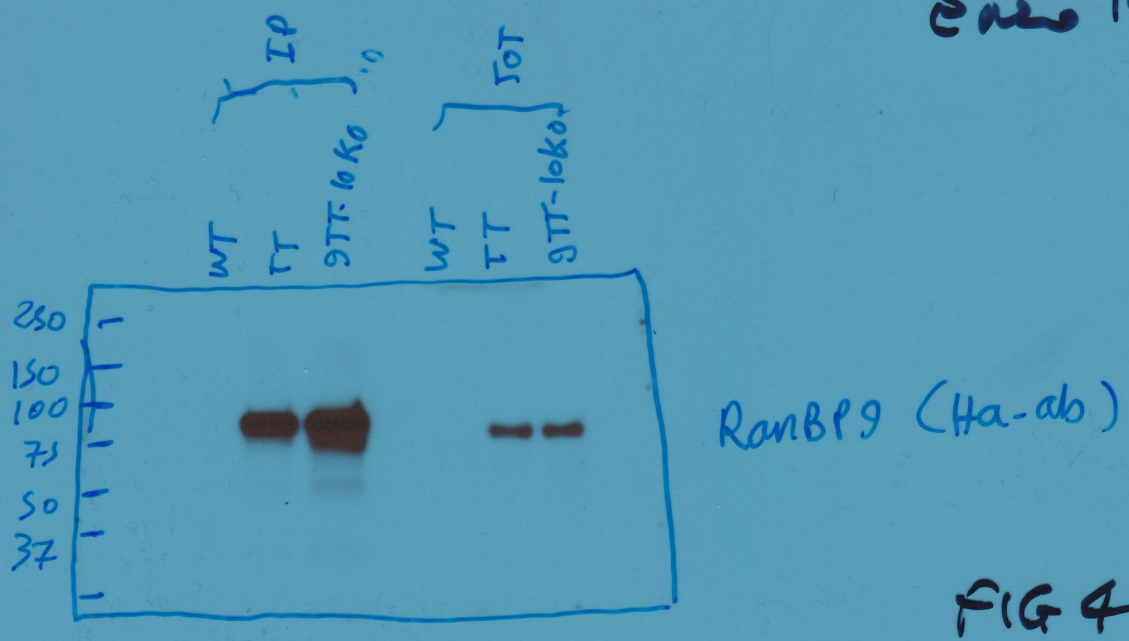

FIG 4E

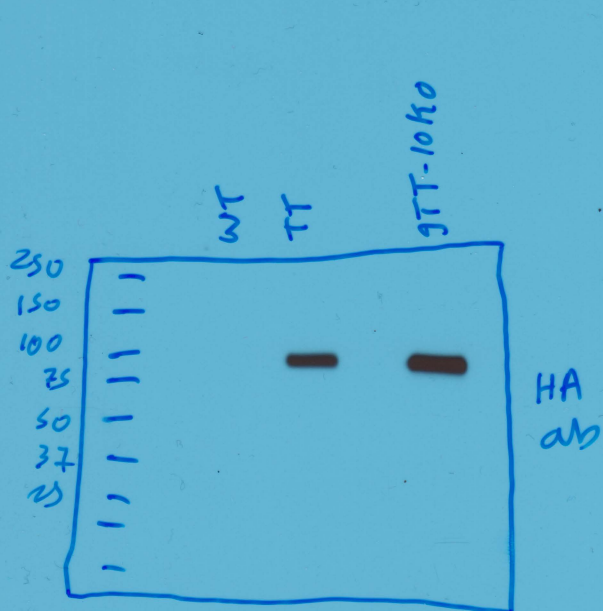

HA IP

IP  $\alpha$  Ha

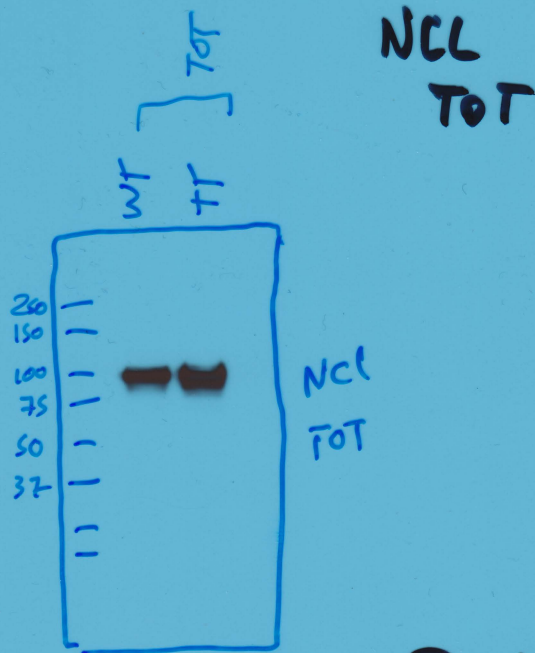

FIG 4F

FIG 4F

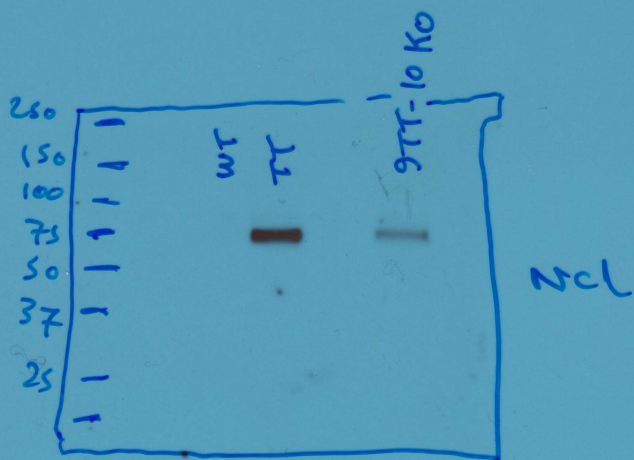

NCL IP

IP  $\alpha$  HA

ENL 1-16-20

FIG 4E

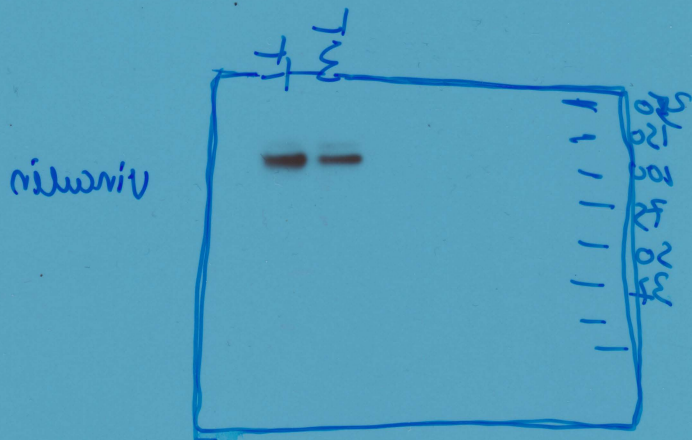

5-01-1 Tot Nucleonin

FIG 4F

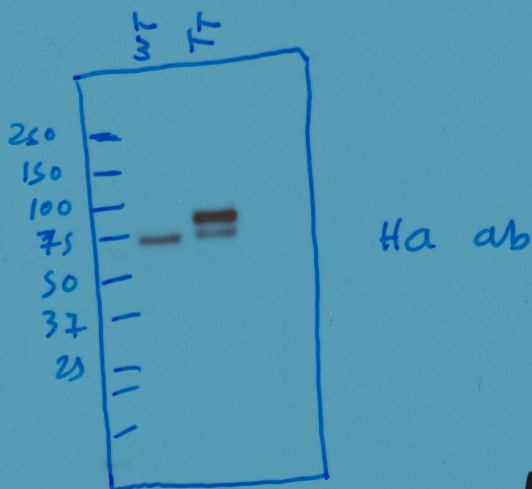

HA tot

1-16-20  
EN2
